# Supplementary material for: Two luminescent transition-metal–organic frameworks with a predesigned ligand as highly sensitive and selective iron(iii) sensors
Source: Royal Society of Chemistry journal article supplement (doi:10.1039/c8nj00656c), 2018-01-01
Supplement: c8nj00656c1.pdf [file c8nj00656c1.pdf]

# **Two Luminescent Transition-Metal–Organic Frameworks with Predesigned Ligand as Highly Sensitive and Selective Iron(III) Sensors**

Jian Zhang, Lili Zhao, Yinxia Liu, Mingyue Li, Gang Li\* and Xiangru Meng\*

*College of Chemistry and Molecular Engineering, Zhengzhou University, Zhengzhou 450001, Henan,  
P. R. China*

## **Supporting Information**

\*To whom correspondence should be addressed.

E-mail: gangli@zzu.edu.cn & mxr@zzu.edu.cn

Tel: (+86) 371-67781764.

Fax: (+86) 371-67781764.

**Table S1.** Selected bond distances (Å) and angles (°) for **1**

|                     |           |                     |           |
|---------------------|-----------|---------------------|-----------|
| Cd(1)-N(1)          | 2.275(2)  | Cd(1)-N(3)#1        | 2.306(2)  |
| Cd(1)-N(2)          | 2.329(3)  | Cd(1)-O(1)          | 2.343(2)  |
| Cd(1)-O(2)#2        | 2.387(2)  | Cd(1)-O(4)#1        | 2.411(2)  |
| N(1)-Cd(1)-N(2)     | 94.34(9)  | O(2)#2-Cd(1)-O(4)#1 | 78.66(8)  |
| N(3)#1-Cd(1)-N(2)   | 96.28(9)  | O(1)-Cd(1)-O(4)#1   | 88.46(8)  |
| N(1)-Cd(1)-O(1)     | 73.46(8)  | N(2)-Cd(1)-O(4)#1   | 162.83(8) |
| N(3)#1-Cd(1)-O(1)   | 86.86(8)  | N(3)#1-Cd(1)-O(4)#1 | 71.51(8)  |
| N(2)-Cd(1)-O(1)     | 103.22(9) | N(1)-Cd(1)-O(4)#1   | 101.11(8) |
| N(1)-Cd(1)-O(2)#2   | 109.27(8) | O(1)-Cd(1)-O(2)#2   | 167.11(8) |
| N(3)#1-Cd(1)-O(2)#2 | 88.58(8)  | N(2)-Cd(1)-O(2)#2   | 89.25(9)  |

Symmetry codes: #1 x, -y+1/2, z-1/2; #2 -x+1, y+1/2, -z+1/2.

**Table S2.** Selected bond distances (Å) and angles (°) for **2**.

|                     |            |                     |            |
|---------------------|------------|---------------------|------------|
| Zn(1)-O(1)#1        | 2.141(3)   | Zn(1)-O(1)          | 2.140(3)   |
| Zn(1)-N(2)#2        | 2.160(5)   | Zn(1)-N(3)#1        | 2.163(3)   |
| Zn(1)-N(3)          | 2.163(3)   | Zn(1)-N(1)          | 2.185(5)   |
| O(1)-Zn(1)-O(1)#1   | 179.00(17) | O(1)#1-Zn(1)-N(2)#2 | 90.50(9)   |
| O(1)-Zn(1)-N(2)#2   | 90.50(9)   | O(1)-Zn(1)-N(3)#1   | 100.23(14) |
| O(1)#1-Zn(1)-N(3)#1 | 79.71(14)  | N(2)#2-Zn(1)-N(3)#1 | 93.64(9)   |
| O(1)-Zn(1)-N(3)     | 79.71(14)  | O(1)#1-Zn(1)-N(3)   | 100.23(14) |
| N(2)#2-Zn(1)-N(3)   | 93.64(9)   | N(3)#1-Zn(1)-N(3)   | 172.71(19) |
| O(1)-Zn(1)-N(1)     | 89.50(9)   | O(1)#1-Zn(1)-N(1)   | 89.50(9)   |
| N(2)#2-Zn(1)-N(1)   | 180.0      | N(3)#1-Zn(1)-N(1)   | 86.36(9)   |
| N(3)-Zn(1)-N(1)     | 86.36(9)   |                     |            |

Symmetry codes: #1 x, -y+1, -z+1; #2 x-1, y, z.

**Table S3.** The quenching efficiency of sensors for Fe<sup>3+</sup>

| <b>Compounds</b>                                                                            | <b>Quenching Efficiency</b> | <b>Reference</b> |
|---------------------------------------------------------------------------------------------|-----------------------------|------------------|
| An azaindole based schiff base AzIm                                                         | 75%                         | 1                |
| micrometer-sized phase of [Tb(TAIP)(DMF) <sub>2</sub> ]                                     | 87%                         | 2                |
| copillar[5]arene PF5                                                                        | 88.4%                       | 3                |
| Tyloxapol (one kind of water soluble oligomer)                                              | 89%                         | 4                |
| [Zn <sub>5</sub> (hfipbb) <sub>4</sub> (trz) <sub>2</sub> (H <sub>2</sub> O) <sub>2</sub> ] | 96.60%                      | 5                |
| Fluorescent conjugated polymer PFCA                                                         | 99%                         | 6                |
| [(CH <sub>3</sub> ) <sub>2</sub> NH <sub>2</sub> ] <sub>2</sub> ·[Tb(bptc)]·xsolvents       | 99.06%                      | 7                |
| [Cd( <i>p</i> -CNPhHIDC)(4,4'-bipy) <sub>0.5</sub> ] <sub>n</sub> ( <b>1</b> )              | 92.6                        | This work        |
| [Zn( <i>p</i> -CNPhHIDC)(4,4'-bipy)] <sub>n</sub> ( <b>2</b> )                              | 88.5                        | This work        |

**Table S4.** Comparison of  $K_{sv}$  values of **1** and **2** towards  $Fe^{3+}$  ion with other compounds

| Compounds                                           | solvents | $K_{sv}(M^{-1})$   | Ref.      |
|-----------------------------------------------------|----------|--------------------|-----------|
| Rhodamine                                           | $CH_3CN$ | $9.75 \times 10^2$ | 8         |
| $Gd_6(L)_3(HL)_2(H_2O)_{10}$                        | water    | $7.89 \times 10^2$ | 9         |
| $Eu_2(MFDA)_2(HCOO)_2(H_2O)_6$                      | DMF      | $1.58 \times 10^3$ | 10        |
| BUT-14                                              | water    | $2.17 \times 10^3$ | 11        |
| Tb-DSOA                                             | water    | $3.54 \times 10^3$ | 12        |
| $EuL_3$                                             | water    | $4.10 \times 10^3$ | 13        |
| Bis(rhodamine)-2                                    | $CH_3CN$ | $5.10 \times 10^3$ | 14        |
| $Eu^{3+}$ @MIL-53-COOH (Al)                         | water    | $5.12 \times 10^3$ | 15        |
| Bis(rhodamine)-1                                    | $CH_3CN$ | $7.50 \times 10^3$ | 16        |
| $Eu(atpt)_{1.5}(phen)(H_2O)$                        | ethanol  | $7.60 \times 10^3$ | 17        |
| Eu-BPDA                                             | water    | $1.25 \times 10^4$ | 18        |
| $La(TPT)(DMSO)_2$                                   | ethanol  | $1.36 \times 10^4$ | 19        |
| BUT-15                                              | water    | $1.66 \times 10^4$ | 11        |
| Eu-HODA                                             | water    | $2.09 \times 10^4$ | 20        |
| $\{[Eu_2K_2(dcppa)_2(H_2O)_6] \cdot mH_2O\}_n$      | water    | $4.3 \times 10^4$  | 21        |
| Benzimidazole-based sensor                          | water    | $8.51 \times 10^4$ | 22        |
| $[Cd(p-CNPhHIDC)(4,4'-bipy)_{0.5}]_n$<br><b>(1)</b> | water    | $1.99 \times 10^3$ | This work |
| $[Zn(p-CNPhHIDC)(4,4'-bipy)]_n$ <b>(2)</b>          | water    | $1.37 \times 10^3$ | This work |

**Table S5** The ICP results of complexes **1** and **2** after treated with Fe<sup>3+</sup> for 12 h

| Complex                                      | 1                             | 2                             |
|----------------------------------------------|-------------------------------|-------------------------------|
| Initial value / Fe <sup>3+</sup>             | 5.0 × 10 <sup>-3</sup> mol/L  | 5.0 × 10 <sup>-3</sup> mol/L  |
| After treated with Fe <sup>3+</sup> for 12 h | 3.23 × 10 <sup>-3</sup> mol/L | 3.75 × 10 <sup>-3</sup> mol/L |

**Table S6** The EA results of complexes **1** and **2** after treated with Fe<sup>3+</sup> for 12 h

| Complex                                      | 1     |      |       | 2     |      |       |
|----------------------------------------------|-------|------|-------|-------|------|-------|
|                                              | C%    | H%   | N%    | C%    | H%   | N%    |
| Original samples                             | 45.68 | 2.01 | 12.31 | 55.42 | 2.63 | 14.68 |
| After treated with Fe <sup>3+</sup> for 12 h | C%    | H%   | N%    | C%    | H%   | N%    |
|                                              | 43.12 | 2.28 | 11.72 | 50.29 | 2.75 | 13.36 |

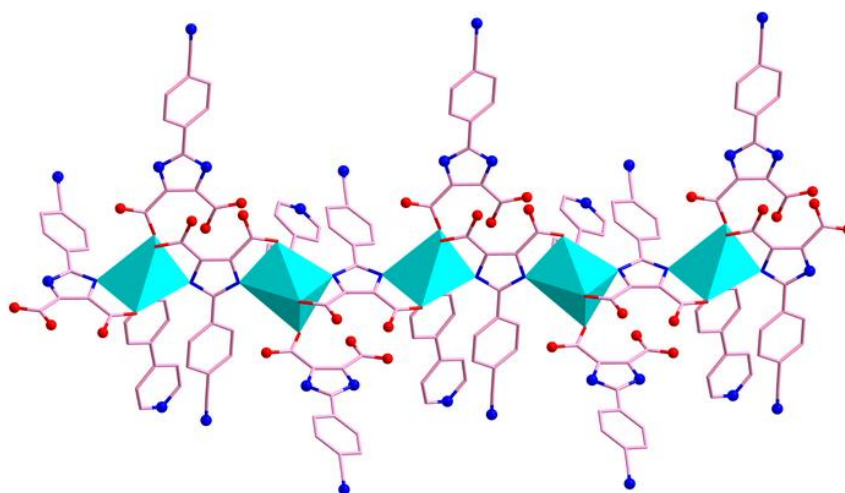

**Fig. S1** 1D chain of **1** supported by imidazole dicarboxylate ligands

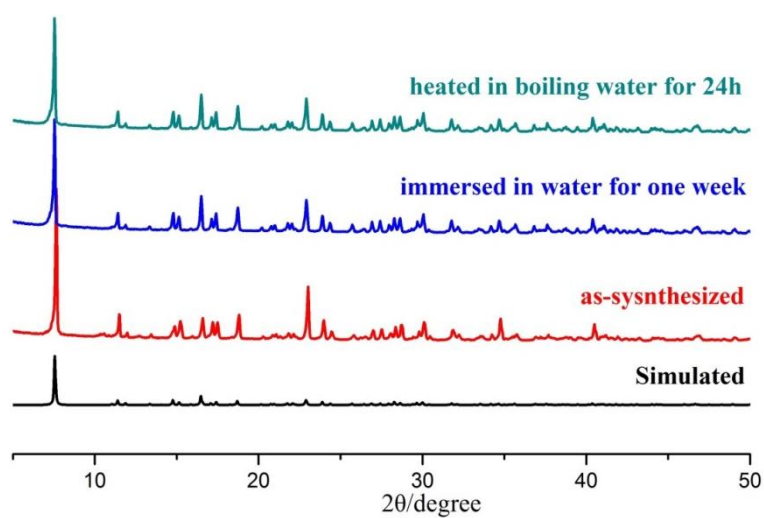

(a)

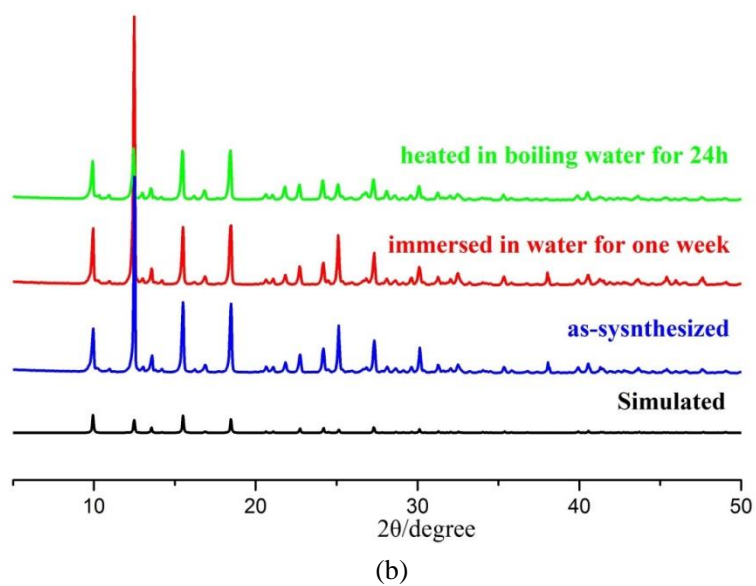

**Fig. S2.** PXRD patterns of **1** (a) and **2** (b) for the simulated, as-synthesized and after water treated samples.

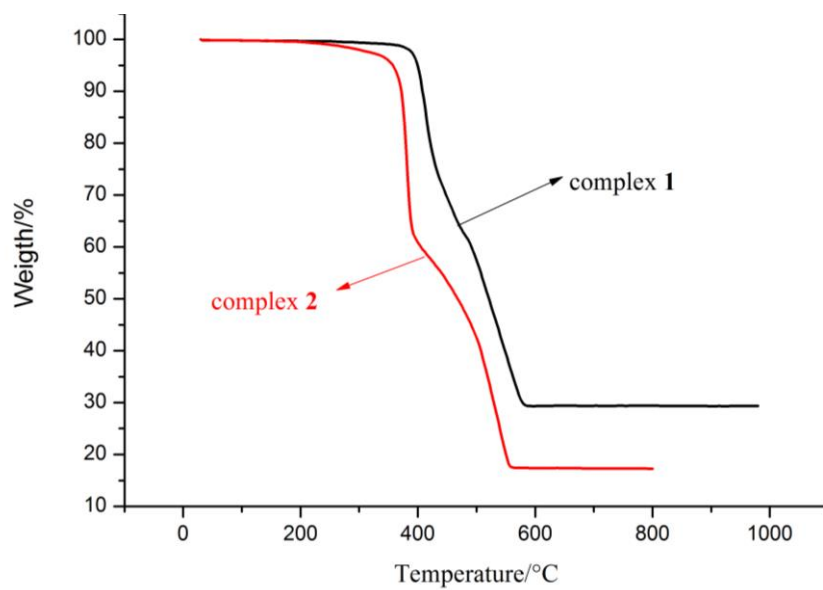

**Fig. S3** Thermal gravimetric analyses of complexes **1** and **2**.

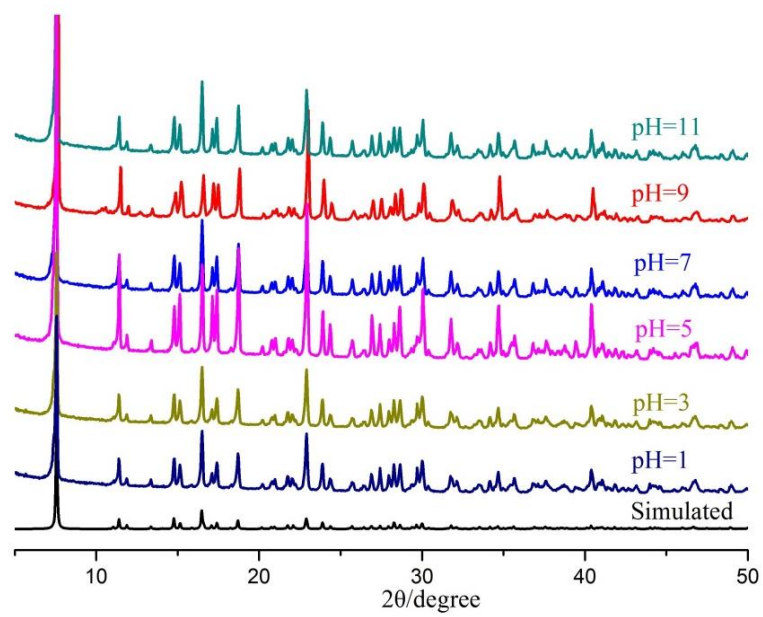

(a)

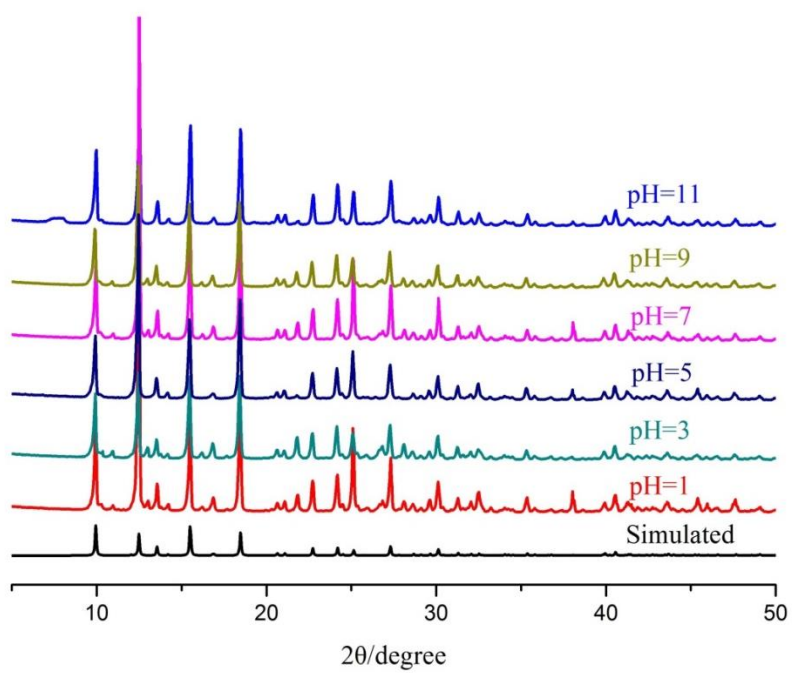

Fig. S4. PXRD patterns of 1 (a) and 2 (b) immersed in different pH solutions

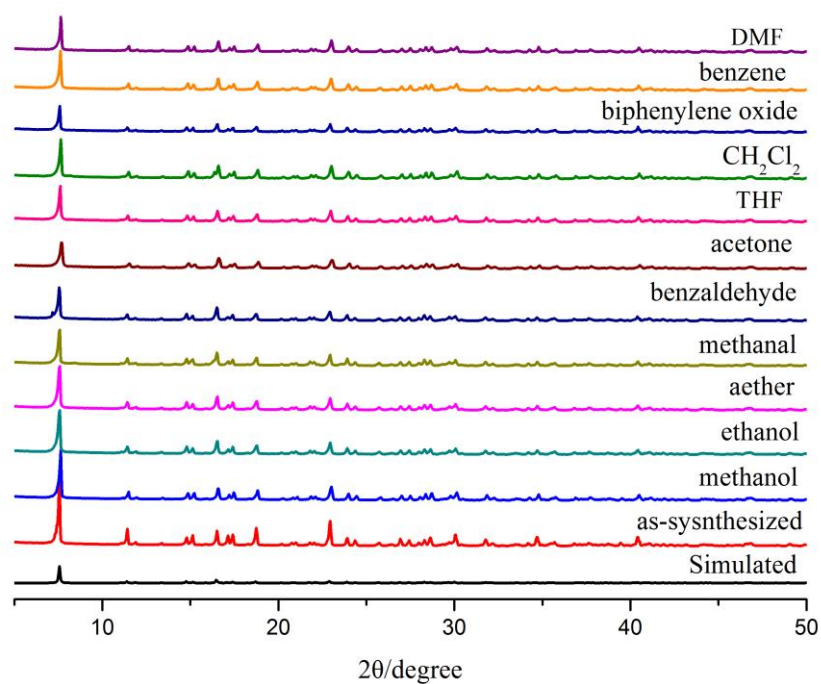

(a)

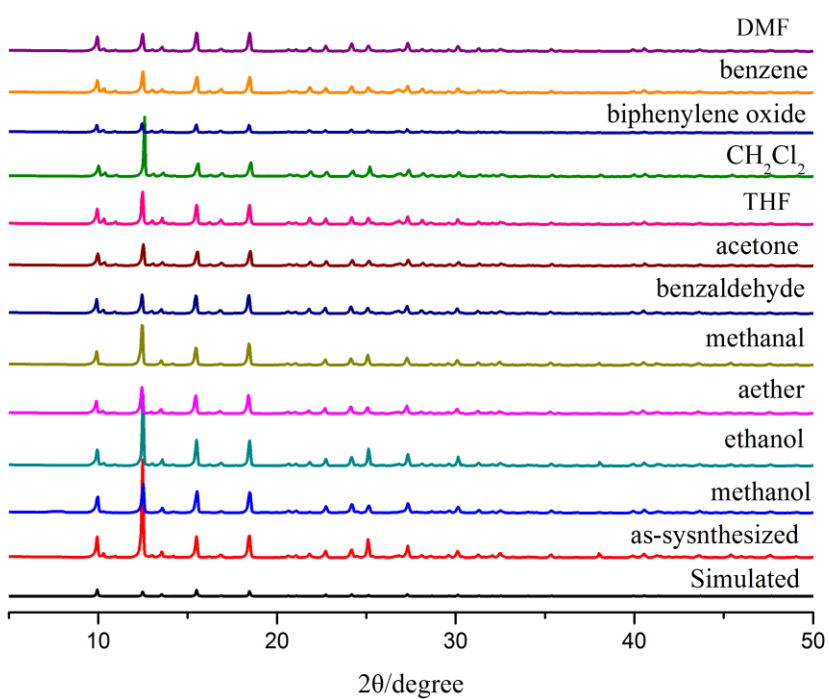

**Fig. S5.** PXRD patterns of **1** (a) and **2** (b) immersed in different solvents at room temperature.



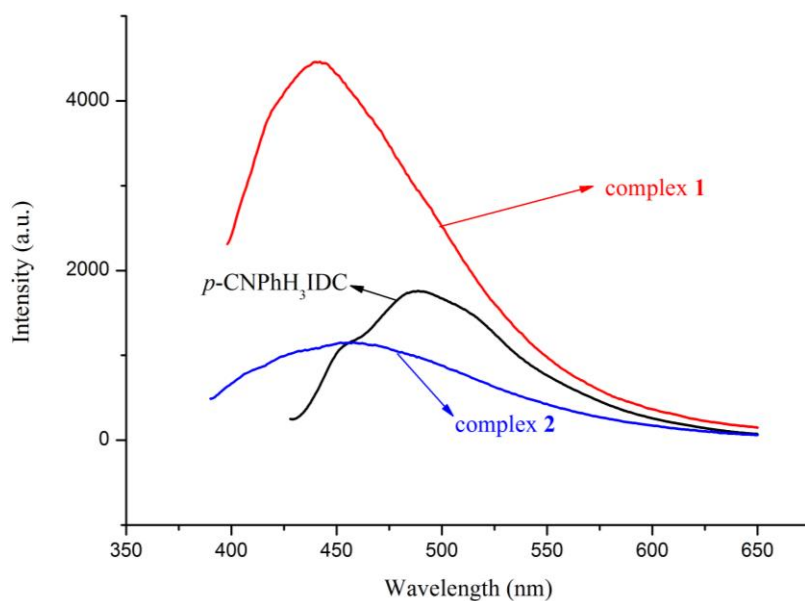

**Fig. S6** Solid-state luminescence spectra of free *p*-CNPhH<sub>3</sub>IDC ligand and complexes **1** and **2** at room temperature.

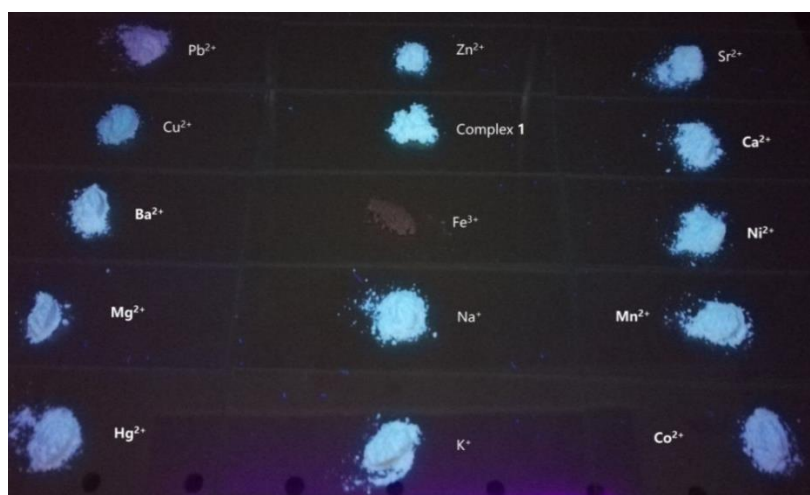

(a)

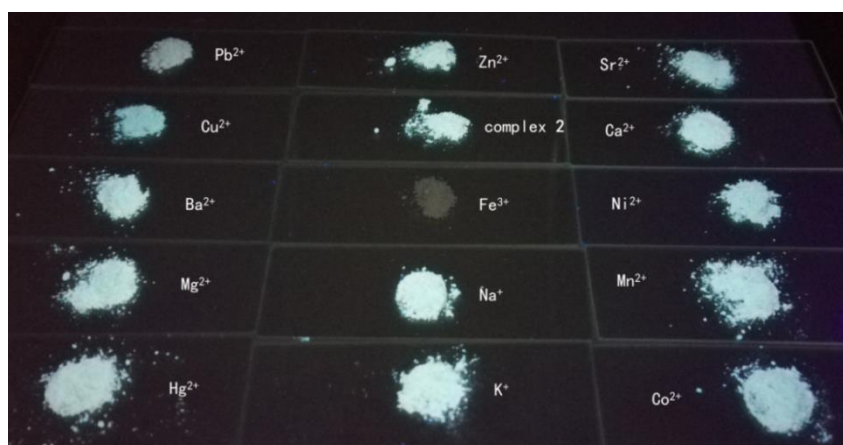

(b)

**Fig. S7** The colors of  $M^{n+}$ -**1** (a) or -**2** (b) samples at room temperature under the excitation of 365 nm.

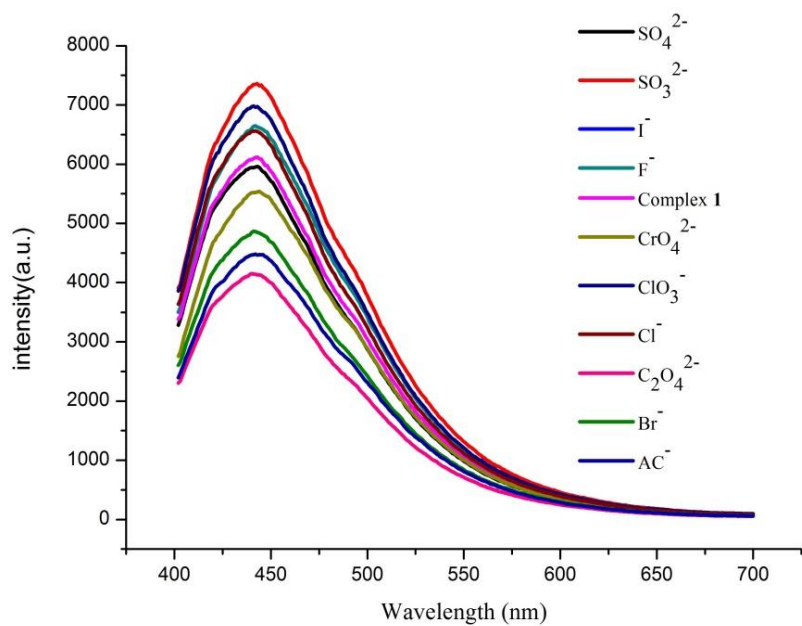

(a)

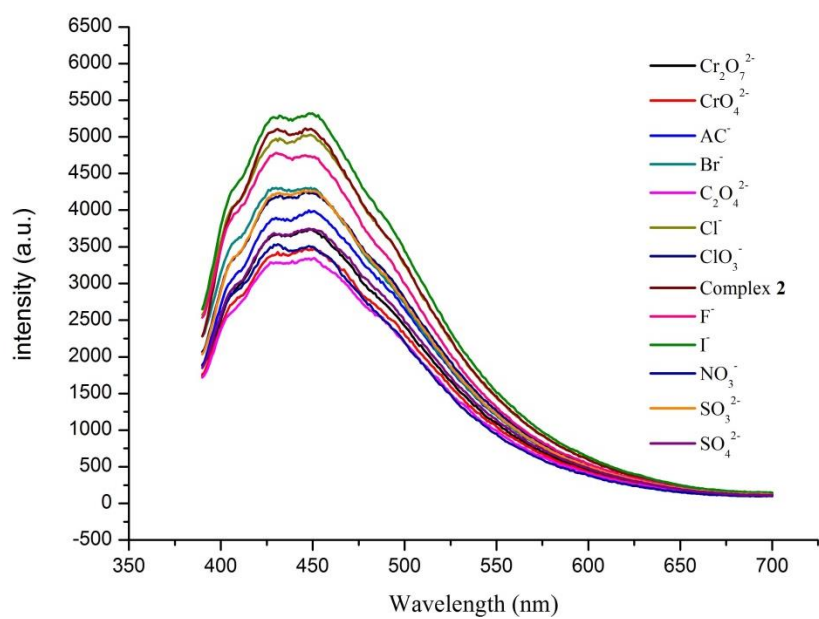

(b)

**Fig. S8** Photoluminescence intensity of complex 1 (a) (or 2 (b)) treated by different anions (0.01 M) in aqueous solutions.

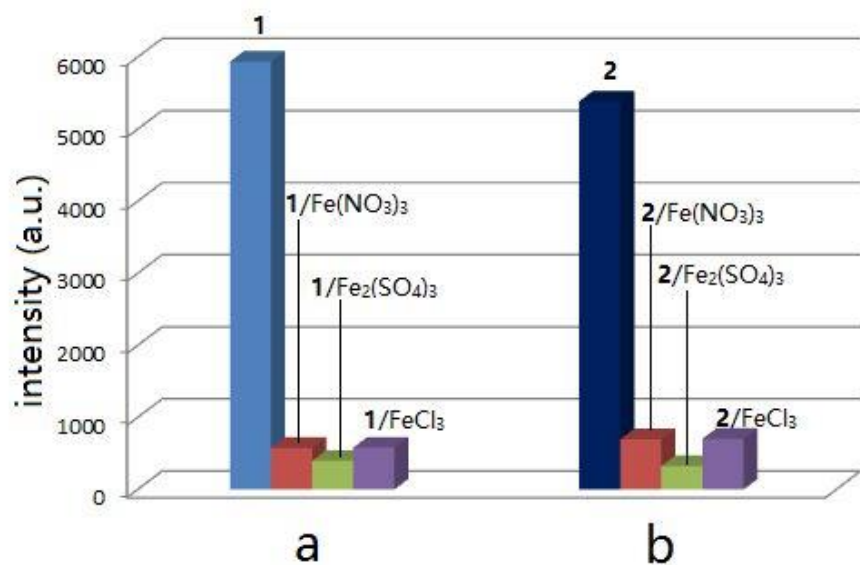

**Fig. S9** Photoluminescence intensity of complex **1** (a) (or **2** (b)) treated by different Fe(III) salts (0.01 M) in aqueous solutions.

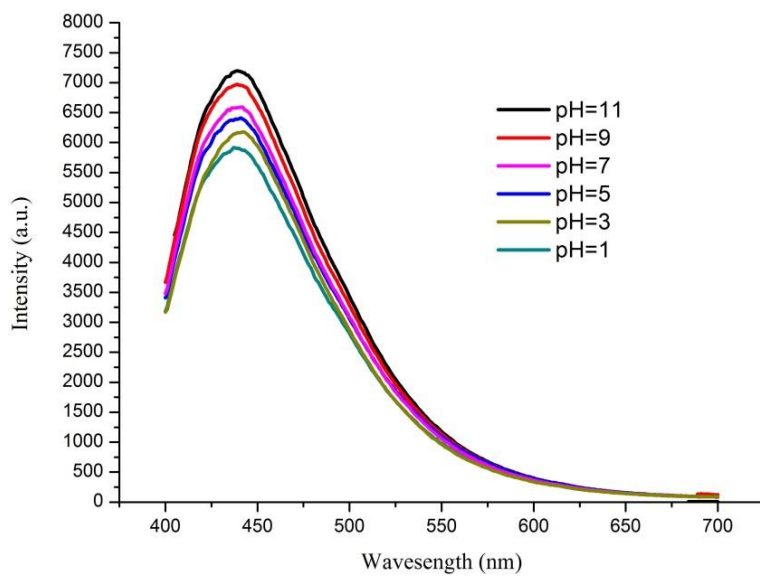

(a)

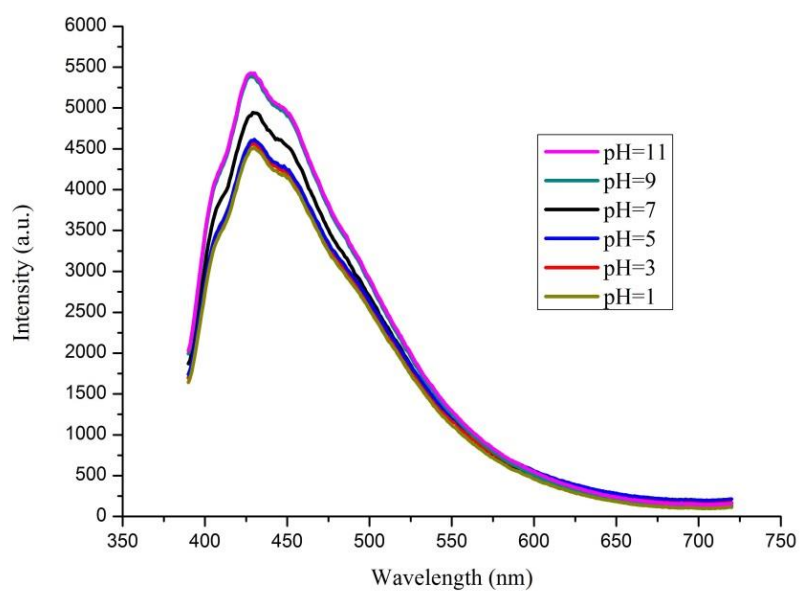

(b)

**Fig. S10** Solid-state luminescence spectra of 1 (a) and 2 (b) treated with different pH aqueous solutions

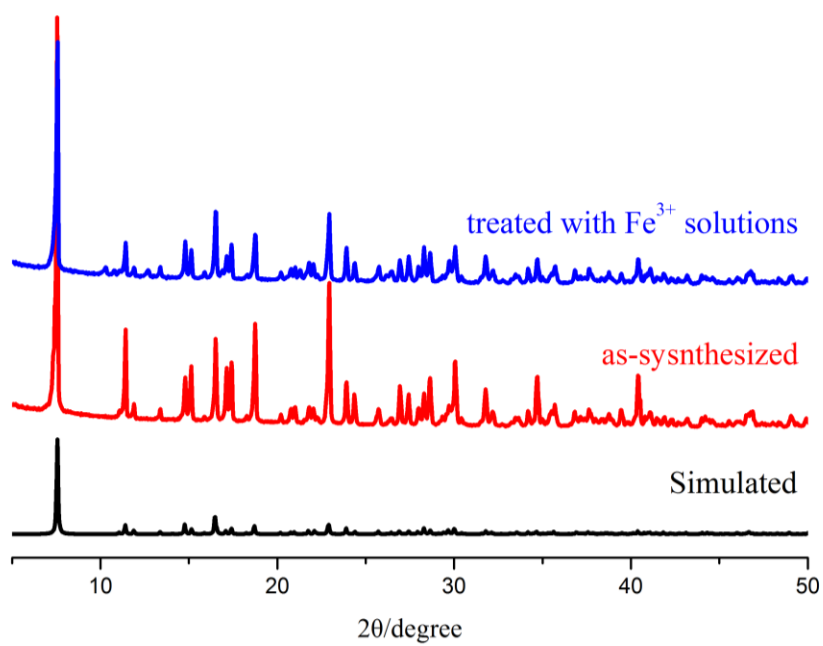

(a)

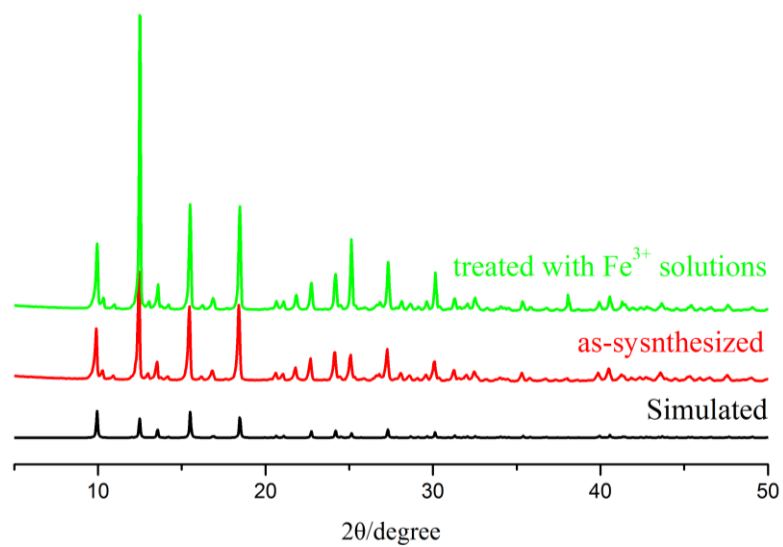

(b)

**Fig. S11** PXR D patterns of simulated, as-synthesized, **1** (a) or **2** (b) immersed in aqueous solution of Fe(NO<sub>3</sub>)<sub>3</sub>.

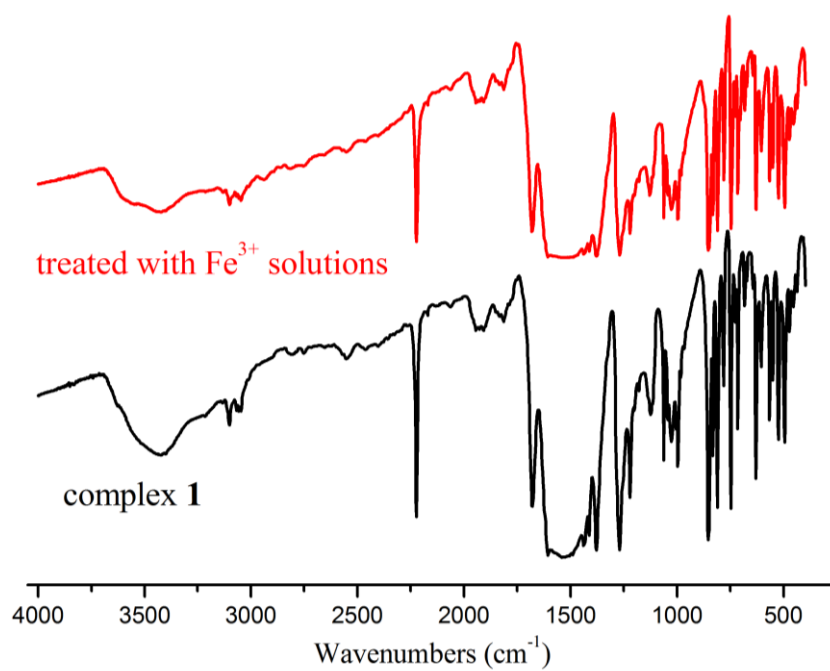

(a)

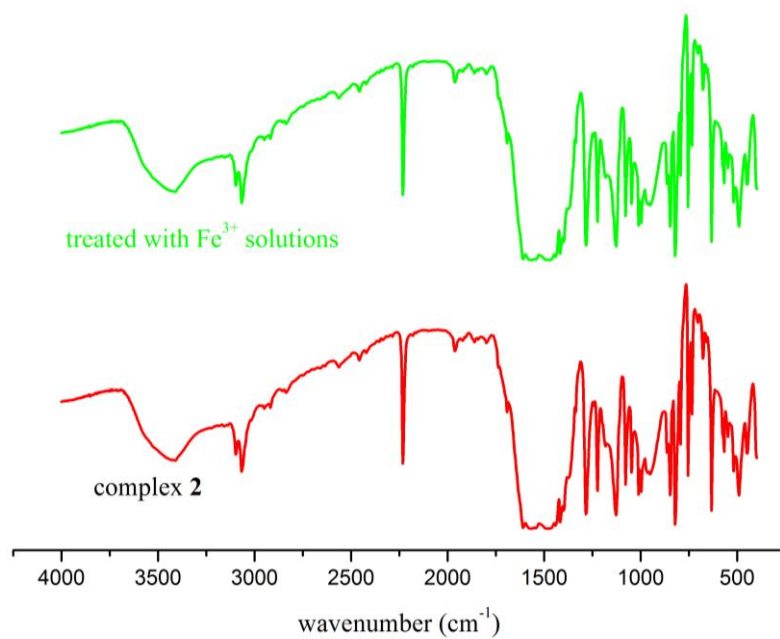

(b)

**Fig. S12** IR spectra of **1** (a) or **2** (b) before and after immersed in aqueous solution of Fe(NO<sub>3</sub>)<sub>3</sub>.

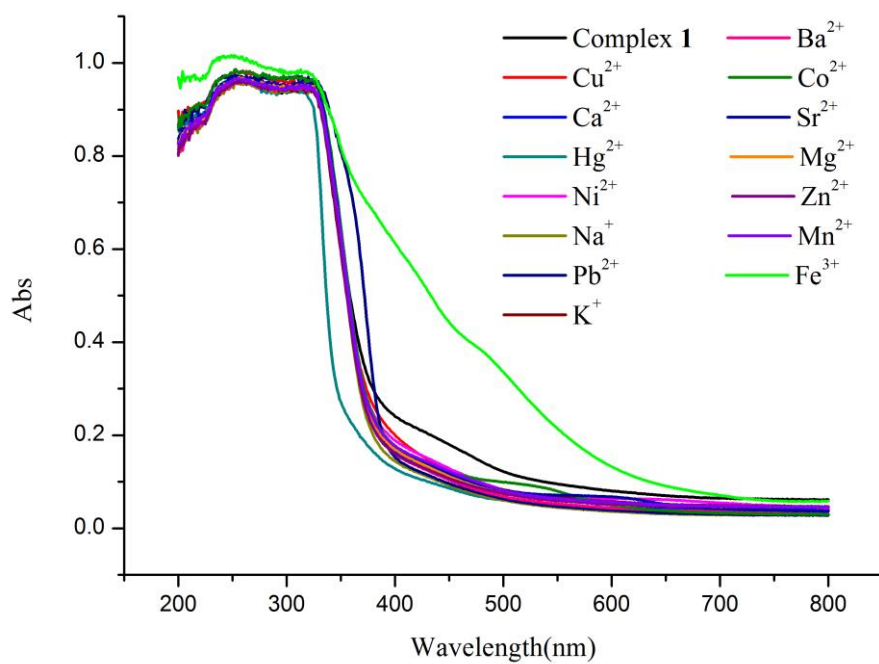

(a)

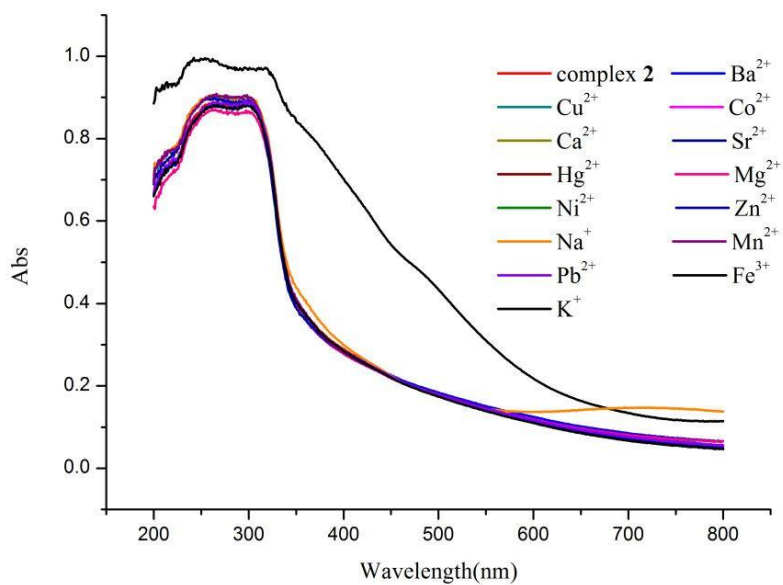

(b)

**Fig. S13** UV-vis spectra of **1** (a) or **2** (b) of the MOFs and incorporated-cation samples.

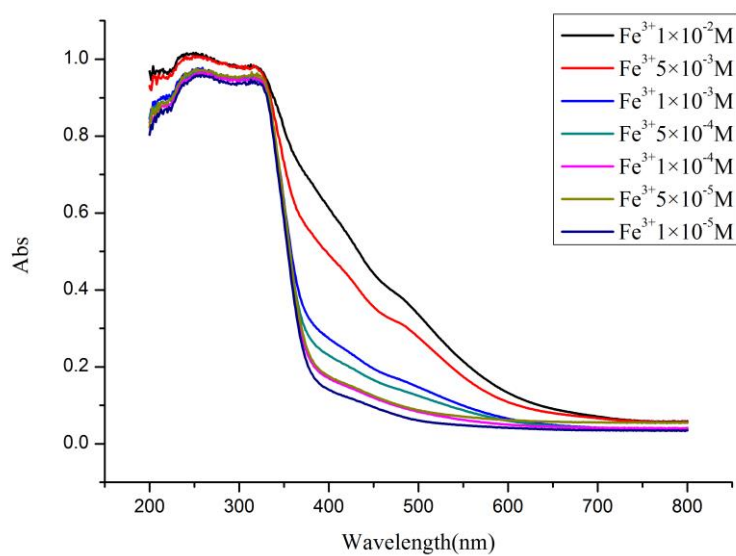

(a)

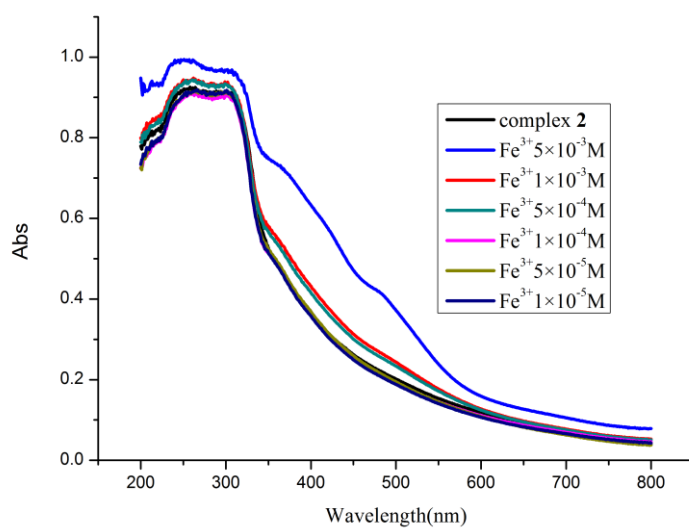

(b)

**Fig. S14.** UV-vis spectra of **1** (a) or **2** (b) upon different concentrations of  $\text{Fe}(\text{NO}_3)_3$

## References

- (1) K. Kaur, S. Chaudhary, S. Singh, S. K. Mehta, *Sensors and Actuators B*, 2016, **232**, 396–401.
- (2) D. Wang, L. B. Sun, C. Q. Hao, Y. N. Yan, Z. Q. Liang, *RSC Adv.*, 2016, **6**, 57828–57834.
- (3) T. B. Wei, B. Cheng, H. Li, F. Zheng, Q. Lin, H. Yao, Y. M. Zhang, *RSC Adv.*, 2016, **6**, 20987–20993.
- (4) L. I. Zhao, X. Xin, P. Ding, A. X. Song, Z. C. Xie, J. L. Shen, G. Y. Xu, *Anal. Chim. Acta*, 2016, **926**, 99–106.
- (5) B. L. Hou, D. Tian, J. Liu, L. Z. Dong, L. L. Shun, D. S. Li, Y. Q. Lan, *Inorg. Chem.*, 2016, **55**, 10580–10586.
- (6) H. Zhang, G. Zhang, J. K. Xu, Y. P. Wen, B. Y. Lu, J. Zhang, W. C. Ding, *Sensors and Actuators B*, 2016, **230**, 123–129.
- (7) X. L. Zhao, D. Tian, Q. Gao, H. W. Sun, J. Xu, X. H. Bu, *Dalton Trans.*, 2016, **45**, 1040–1046.
- (8) C. X. Yang, H. B. Ren, X. P. Yan, *Anal. Chem.*, 2013, **85**, 7441–7446.
- (9) Q. H. Tan, Y. Q. Wang, X. Y. Guo, H. T. Liu, Z. L. Liu, *RSC Adv.*, 2016, **6**, 61725–61731.
- (10) X. H. Zhou, L. Li, H. H. Li, A. Li, T. Yang, W. Huang, *Dalton Trans.*, 2013, **42**, 12403–12409.
- (11) B. Wang, Q. Yang, C. Guo, Y. X. Sun, L. H. Xie, J. R. Li, *ACS Appl. Mater. Interfaces*, 2017, **11**, 10286–10295.
- (12) X. Y. Dong, R. Wang, J. Z. Wang, S. Q. Zang, T. C. W. Mak, *J. Mater. Chem. A*, 2015, **3**, 641–647.
- (13) M. Zheng, H. Tan, Z. Xie, L. Zhang, X. Jing, Z. Sun, *ACS Appl. Mater. Interfaces*, 2013, **5**, 1078–1083.
- (14) A. J. Weerasinghe, C. Schmiesing, S. Varaganti, G. Ramakrishna, E. Sinn, *J. Phys. Chem. B*, 2010, 9413–9419.
- (15) C. Zhang, Y. Yan, Q. Pan, L. Sun, H. He, Y. Liu, Z. Liang, J. Li, *Dalton Trans.*, 2015, **44**, 13340–13346.
- (16) M. Wang, J. G. Wang, W. Xue, A. Wu, *Dyes Pigments.*, 2013, **97**, 475–480.
- (17) Y. Kang, X. J. Zheng, L. P. Jin, *J. Colloid. Interface. Sci.*, 2016, **471**, 1–6.
- (18) J. Wang, Y. Li, M. Jiang, L. Zhang, P. Wu, *New J. Chem.*, 2016, **40**, 8600–8606.



- (19) D. Alezi, Y. Belmabkhout, M. Suyetin, P. M. Bhatt, Ł. J. Weselinski, V. Solovyeva, K. Adil, I. Spanopoulos, P. N. Trikalitis, A.-H. Emwas, M. Eddaoudi, *J. Am. Chem. Soc.*, 2015, **137**, 13308-13318.
- (20) J. Wang, M. Jiang, L. Yan, R. Peng, M. J. Huangfu, X. X. Guo, Y. Li, and P. Y. Wu, *Inorg. Chem.*, 2016, **55**, 12660–12668
- (21) H. J. Zhang, R. Q. Fan, W. Chen, J. Z. Fan, Y. W. Dong, Y. Song, X. Du, P. Wang, and Y. L. Yang, *Cryst. Growth Des.*, 2016, **16**, 5429–5440.
- (22) A. J. Weerasinghe, F. A. Abebe, E. Sinn, *Tetrahedron Lett.*, 2011, **52**, 5648-5651.
